# Supplementary figures and images for: Role of alpha-synuclein in autophagy modulation of primary human T lymphocytes
Source: PubMed Central journal article supplement — Cell Death Dis. 2014 May 29;5(5):e1265–. doi: 10.1038/cddis.2014.211 (PMC4047919; doi:10.1038/cddis.2014.211), 2014-05-29

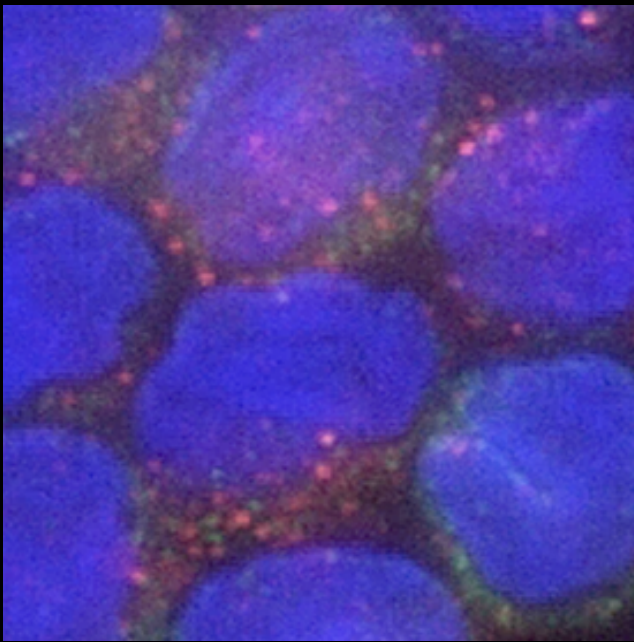

Control

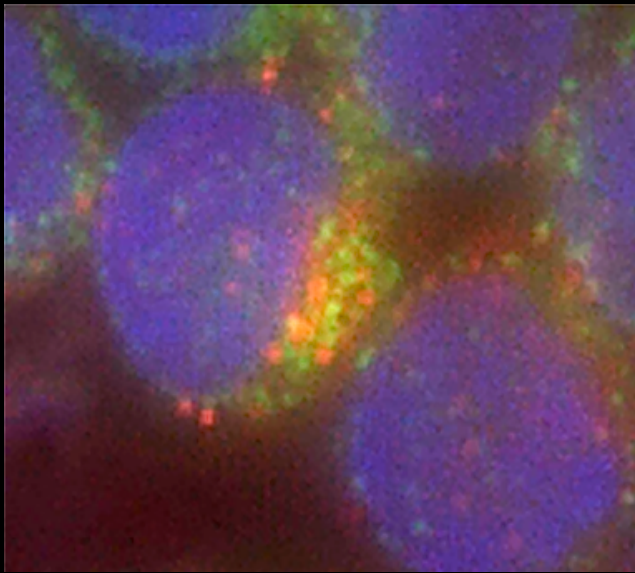

Starved

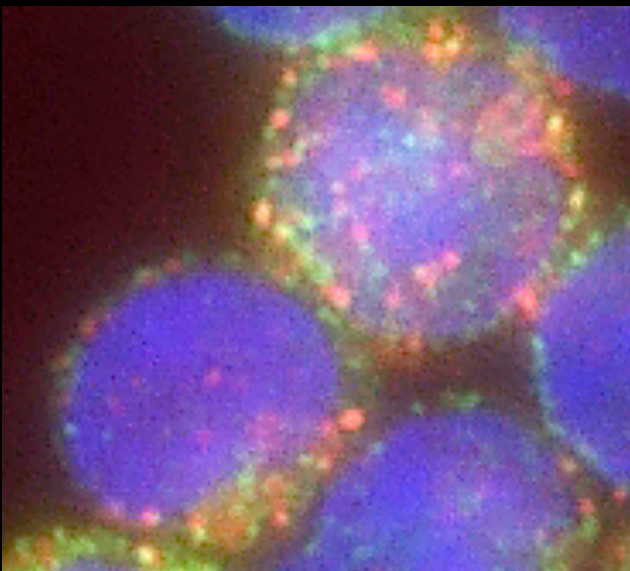

Starved  
plus protease  
inhibitors

Supplement: cddis2014211x1.pdf [file cddis2014211x1.pdf]
